# Supplementary material for: The biological effect of the nitroimidazole derivative of a polypyridyl ruthenium complex on cancer and endothelial cells
Source: Royal Society of Chemistry journal article supplement (doi:10.1039/c5mt00037h), 2015-01-01
Supplement: c5mt00037h1.pdf [file c5mt00037h1.pdf]

Supplementary Information

**Biological effect of nitroimidazole derivative of polypyridyl Ru complex on cancer and endothelial cells**

Olga Mazuryk<sup>a</sup>, Franck Suzenet<sup>b</sup>, Claudine Kieda<sup>c,\*</sup>, Małgorzata Brindell<sup>a,\*</sup>

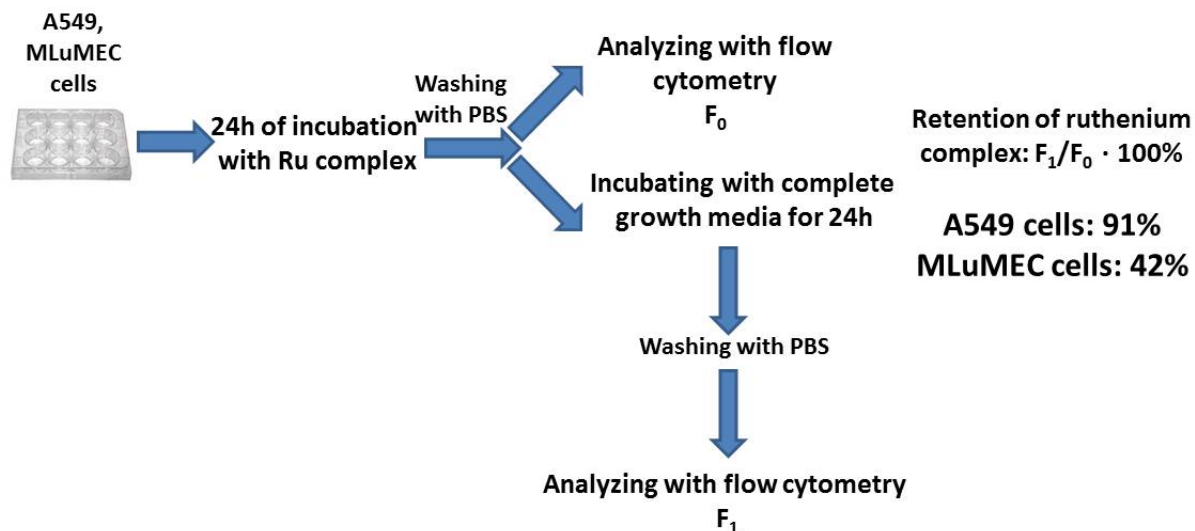

Scheme S1. Schematic representation of the determination of retention of [Ru(dip)<sub>2</sub>(bpy-NitroIm)]<sup>2+</sup> in A549 and MLuMEC cell lines.

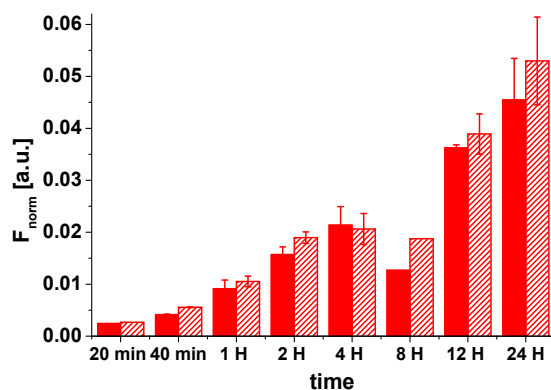

Fig. S1. Time dependence accumulation of [Ru(dip)<sub>2</sub>(bpy-NitroIm)]<sup>2+</sup> (4 μM) under normoxic (filled) and hypoxic (dashed) conditions in MLuEC FVB cells in medium with 2% serum.

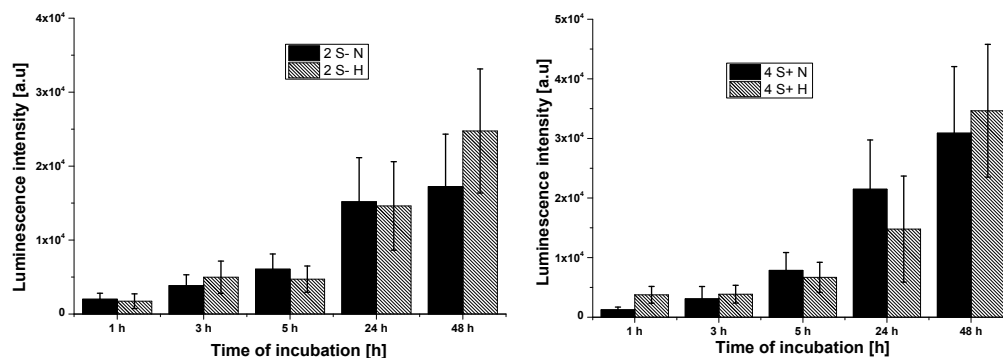

Fig. S2. Time dependence accumulation of [Ru(dip)<sub>2</sub>(bpy-NitroIm)]<sup>2+</sup> (2 and 4 μM) under normoxic (filled) and hypoxic (dashed) conditions in A549 cells in medium without (S-) or with (S+, 2%) serum.

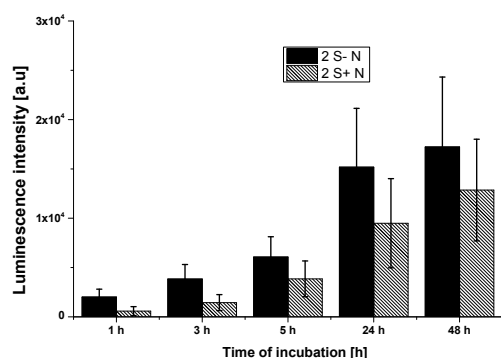

Fig. S3. Influence of serum addition on accumulation of [Ru(dip)<sub>2</sub>(bpy-NitroIm)]<sup>2+</sup> (2 μM) in A549 cells lines under normoxic conditions for various incubation time. The filled bars denote serum free (S-) while the dashed bars stand for the presence of serum (S+, 2%).

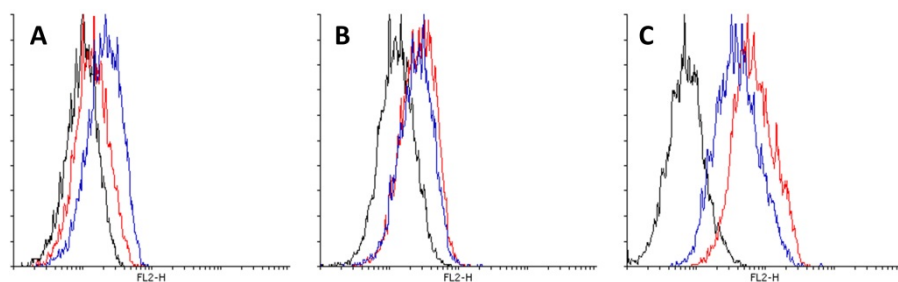

Fig. S4. Accumulation profile of [Ru(dip)<sub>2</sub>(bpy-NitroIm)]<sup>2+</sup> (4 μM) in 4T1 cells conducted in the presence of 2% serum under normoxic (red) and hypoxic (blue) conditions after 2 (A), 4 (B) and 24 h (C) incubation time. Black line stands for control.

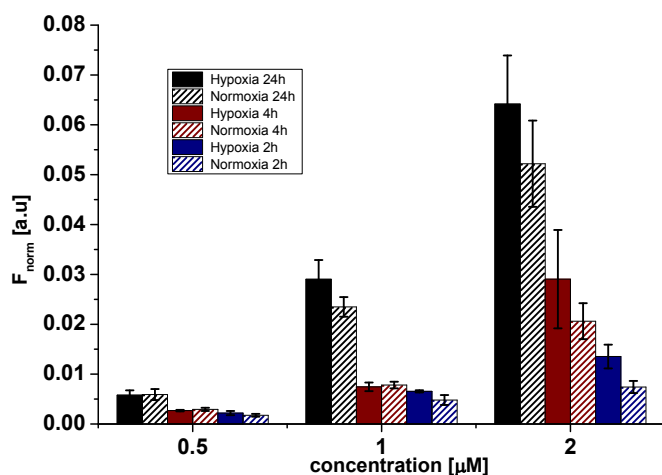

Fig. S5. Concentration dependence of accumulated  $[\text{Ru}(\text{dip})_2(\text{bpy-NitroIm})]^{2+}$  in MLEuEC FVB cells conducted in medium without serum under normoxic (filled bar) and hypoxic (dashed bar) conditions after 2 (blue), 4 (red) and 24 h (black) of incubation time.

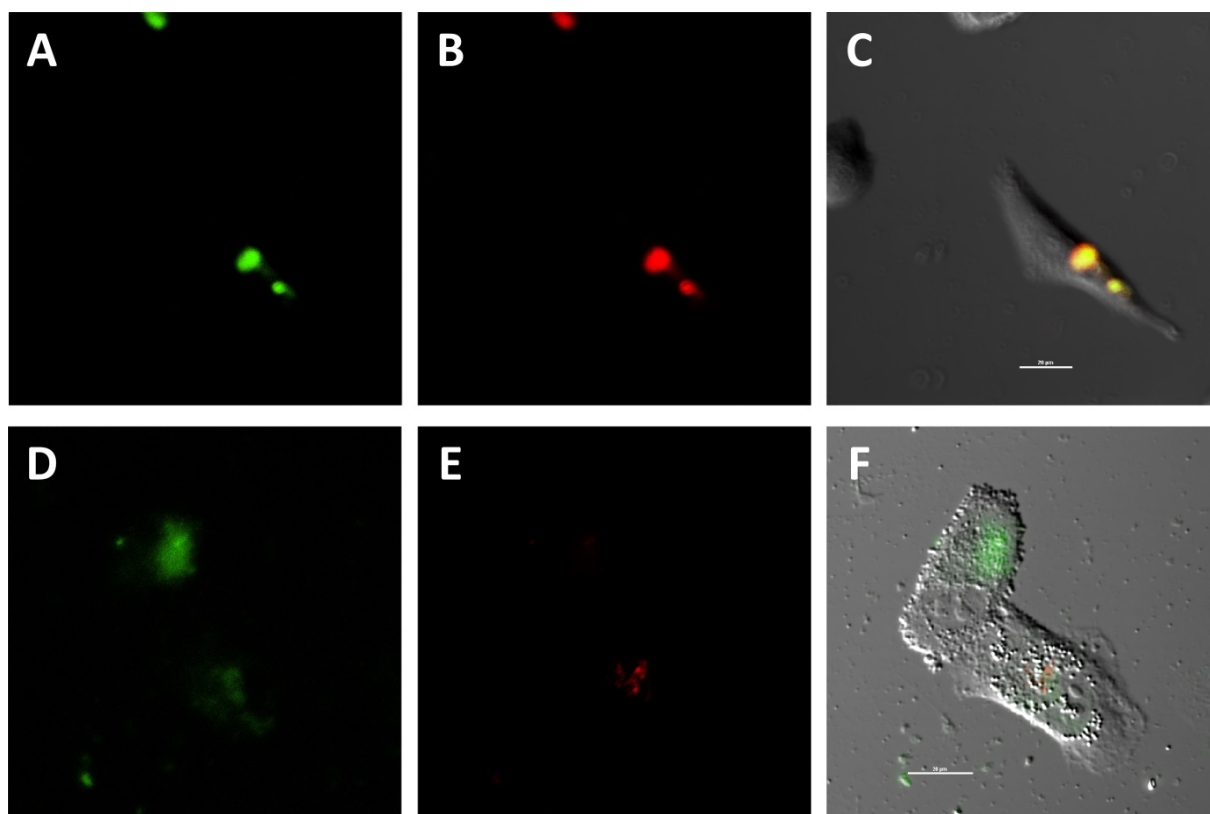

Fig. S6. Confocal microscopy of A549 cells showing subcellular localization of  $[\text{Ru}(\text{dip})_2(\text{bpy-NitroIm})]^{2+}$ . (A, B, C) CellLight® ER-RFP was used to image endoplasmic reticulum (ER). (D, E, F) CellLight® Golgi-RFP was used to image Golgi. Green color denotes intrinsic emission of Ru complexes (8 μM, 30 min of incubation at 37 °C), whereas

red color arises from organelle-specific dyes. The yellow color occurs due to the overlap of the green luminescence from the  $[\text{Ru}(\text{dip})_2(\text{bpy-NitroIm})]^{2+}$  and red emission from dyes, indicating co-localization. Ru complex primary localizes in ER. Scale bar is 20  $\mu\text{m}$ .

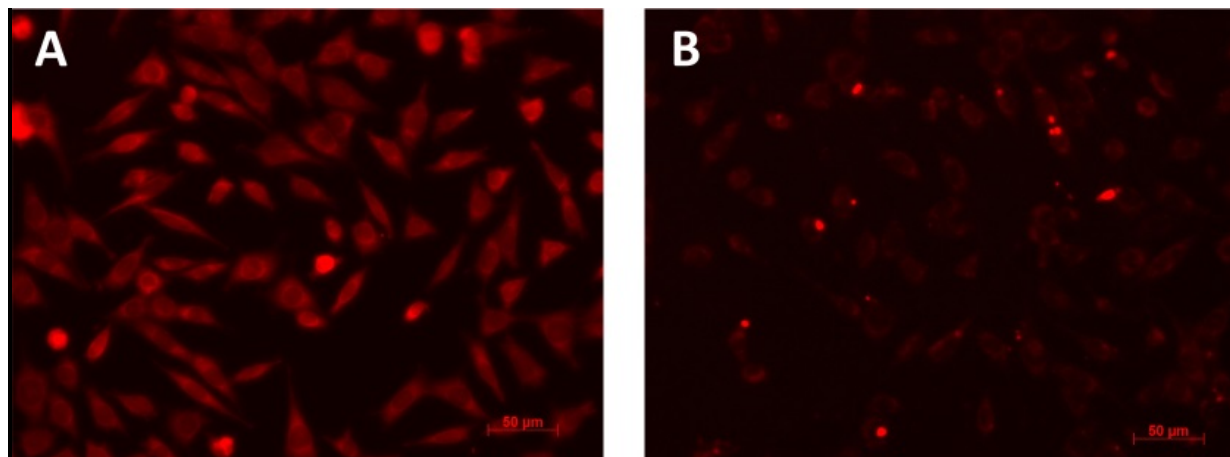

Fig. S7. Fluorescence imaging of MLuMEC FVB cells incubated with 6  $\mu\text{M}$   $[\text{Ru}(\text{dip})_2(\text{bpy-NitroIm})]^{2+}$  for 1 h at 37  $^{\circ}\text{C}$  observed in fixed (A) and alive (B) cells.

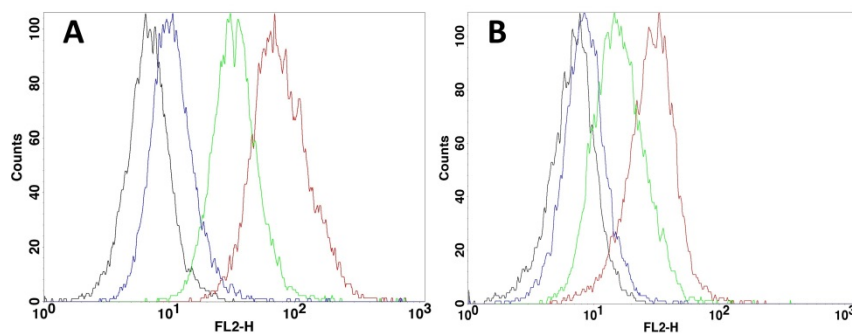

Fig. S8. Effect of incubation temperature on  $[\text{Ru}(\text{dip})_2(\text{bpy})]^{2+}$  (A) and  $[\text{Ru}(\text{dip})_2(\text{bpy-NitroIm})]^{2+}$  (B) cellular uptake measured by flow cytometry. MLuMEC FVB cells were incubated with 2  $\mu\text{M}$  compounds for 1 h (black – white cells, blue – incubation at 4  $^{\circ}\text{C}$ , green – incubation at 20  $^{\circ}\text{C}$ , red – incubation at 37  $^{\circ}\text{C}$ ).

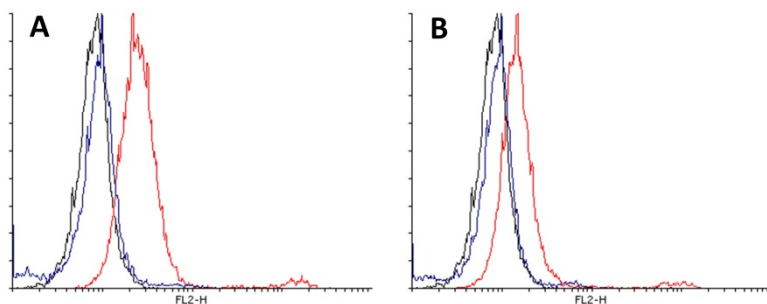

Fig. S9. Effect of membrane fluidity on  $[\text{Ru}(\text{dip})_2(\text{bpy})]^{2+}$  (A) and  $[\text{Ru}(\text{dip})_2(\text{bpy-NitroIm})]^{2+}$  (B) cellular uptake measured by flow cytometry. MLuMEC FVB cells were incubated with 2  $\mu\text{M}$  compounds for 1 h with (red) or without (black) pre-incubation with M $\beta$ CD.

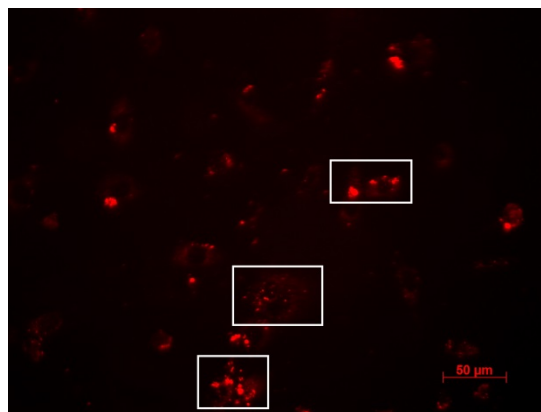

Fig. S10. Fluorescence imaging of MLuMEC FVB cells incubated with 2  $\mu\text{M}$   $[\text{Ru}(\text{dip})_2(\text{bpy-NitroIm})]^{2+}$  for 24 h at 37 °C. The dot-like staining pattern of labelling suggests accumulation of Ru complex in endosomes.

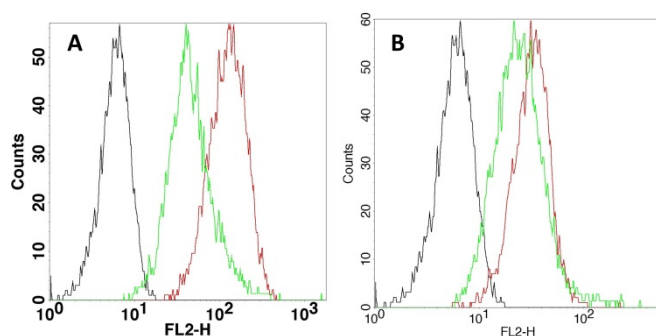

Fig. S11. Effect of depolarization of membrane with gramicidin on  $[\text{Ru}(\text{dip})_2(\text{bpy})]^{2+}$  (A) and  $[\text{Ru}(\text{dip})_2(\text{bpy-NitroIm})]^{2+}$  (B) cellular uptake measured by flow cytometry. MLuMEC FVB cells were incubated with 2  $\mu\text{M}$  compounds for 1 h with (red) or without (green) 30 min pre-incubation with 5  $\mu\text{M}$  gramicidin.

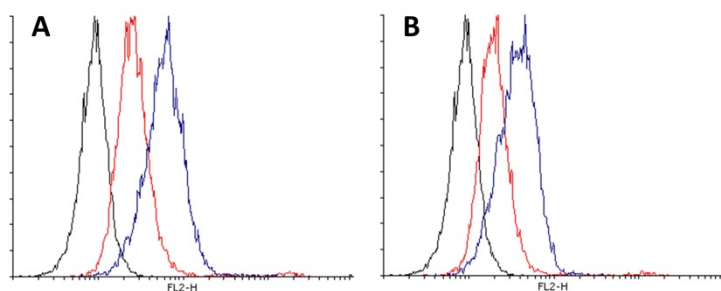

Fig. S12. Effect of hyperpolarization of membrane with valinomycin on  $[\text{Ru}(\text{dip})_2(\text{bpy})]^{2+}$  (A) and  $[\text{Ru}(\text{dip})_2(\text{bpy-NitroIm})]^{2+}$  (B) cellular uptake measured by flow cytometry. MLuMEC FVB cells were incubated with 2  $\mu\text{M}$  compounds for 1 h with (blue) or without (red) 30 min pre-incubation with 50  $\mu\text{M}$  valinomycin.

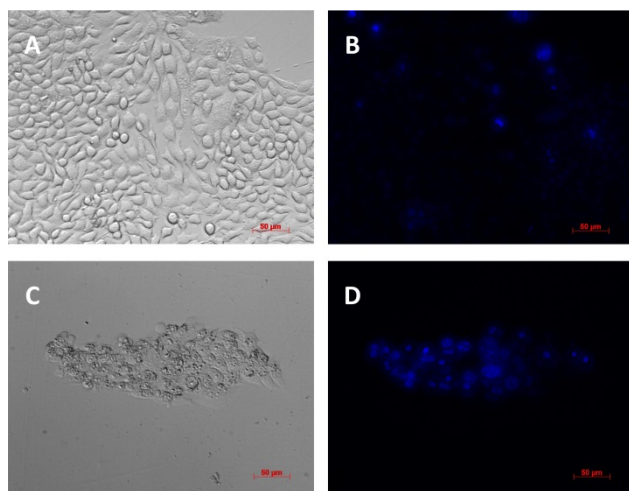

Fig. S13. DIC (C) and corresponded fluorescence (D) images of 4T1 cells after treatment with 8  $\mu\text{M}$   $[\text{Ru}(\text{dip})_2(\text{bpy-NitroIm})]^{2+}$  for 24 h. (A) and (B) show control cells.

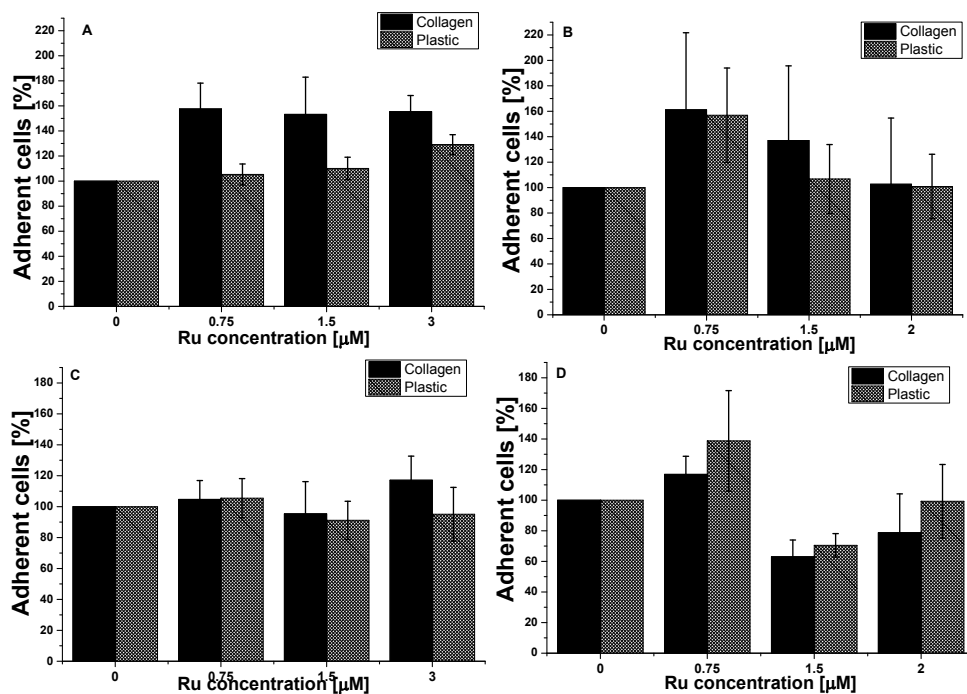

Fig. S14. The effect of  $[\text{Ru}(\text{dip})_2(\text{bpy-NitroIm})]^{2+}$  (A, C) and  $[\text{Ru}(\text{dip})_2(\text{bpy})]^{2+}$  (B, D) in the resistance of trypsin test for 4T1 cancer cells (A, B) and MLuMEC cells (C, D).

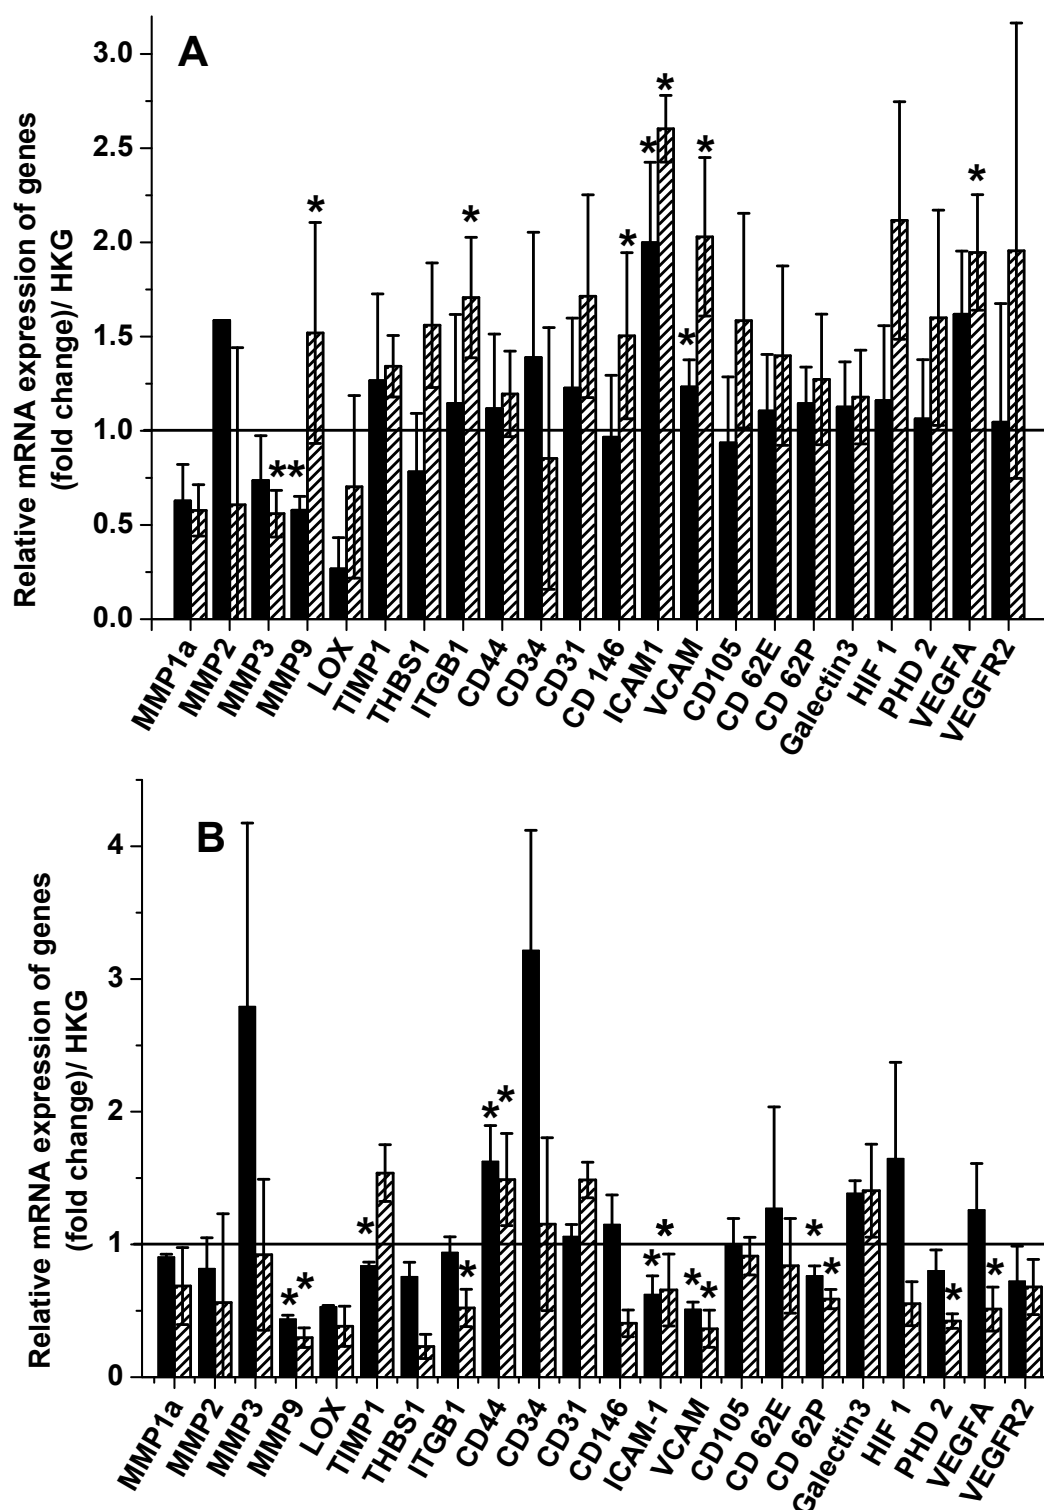

Fig. S15. The relative mRNA expression level of several genes (fold change) after 24 h incubation with  $[\text{Ru}(\text{dip})_2(\text{bpy-NitroIm})]^{2+}$  (filled bars) and  $[\text{Ru}(\text{dip})_2(\text{bpy})]^{2+}$  (dashed bars) under normoxic (A) and hypoxic (B) conditions in 4T1 cell line. The results presented in graphs are means  $\pm$  SEM of the experiments performed in three biological replicates. Student's t-test was used for statistical analyses: \* $p < 0.05$  was considered statistically significant.

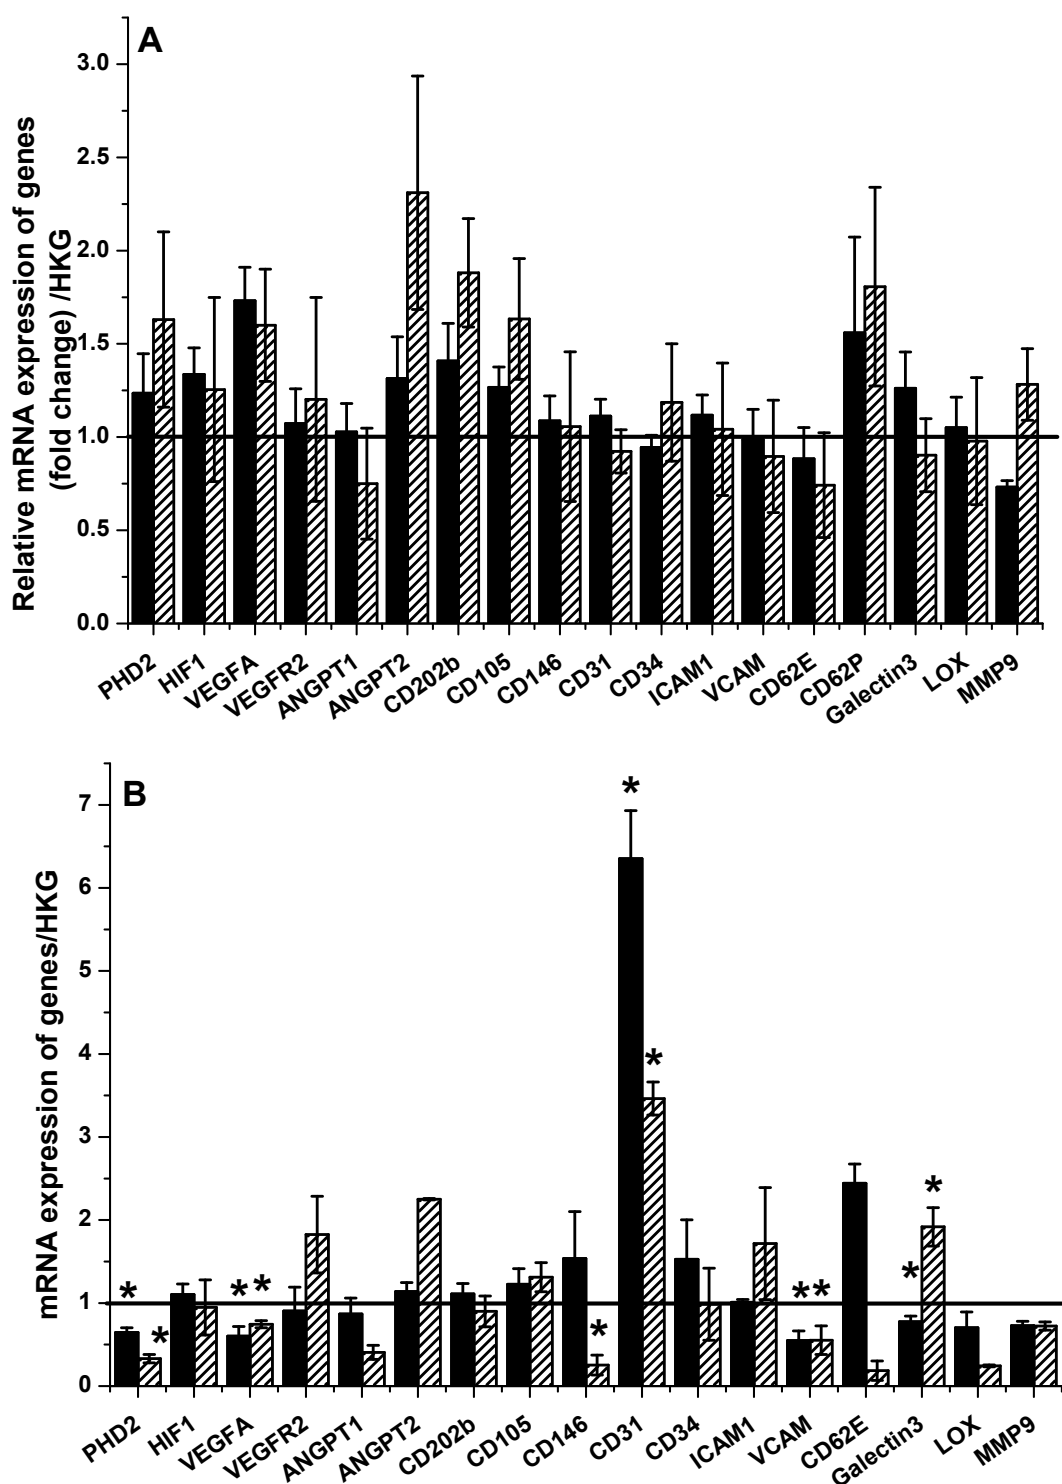

Fig. S16. The relative mRNA expression level of several genes (fold change) after 24 h incubation with  $[\text{Ru}(\text{dip})_2(\text{bpy-NitroIm})]^{2+}$  (filled bars) and  $[\text{Ru}(\text{dip})_2(\text{bpy})]^{2+}$  (dashed bars) under normoxic (A) and hypoxic (B) conditions in MLuMEC cell line. The results presented in graphs are means  $\pm$  SEM of the experiments performed in three biological replicates. Student's t-test was used for statistical analyses: \* $p < 0.05$  was considered statistically significant.
